# Supplementary material for: Probiotic Potential of a Folate-Producing Strain Latilactobacillus sakei LZ217 and Its Modulation Effects on Human Gut Microbiota
Source: MDPI journal article supplement (doi:10.3390/foods11020234), 2022-01-16
Supplement: s1 [file s1]

Supplementary Material

Figure Captions

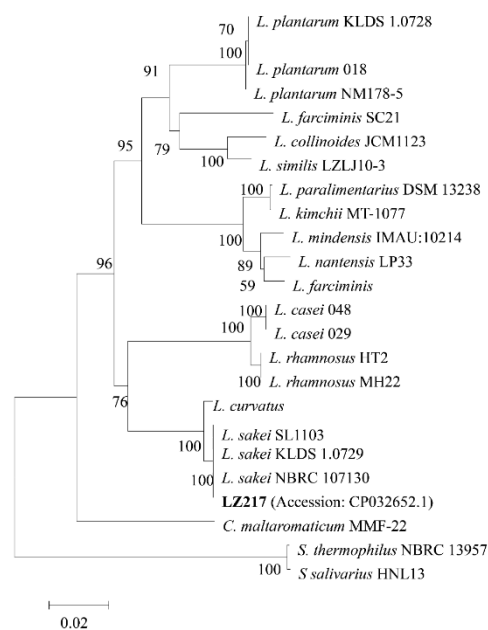

**Figure S1.** The phylogenetic tree of *Lactobacillus sakei* LZ217 based on 16S rDNA sequence.

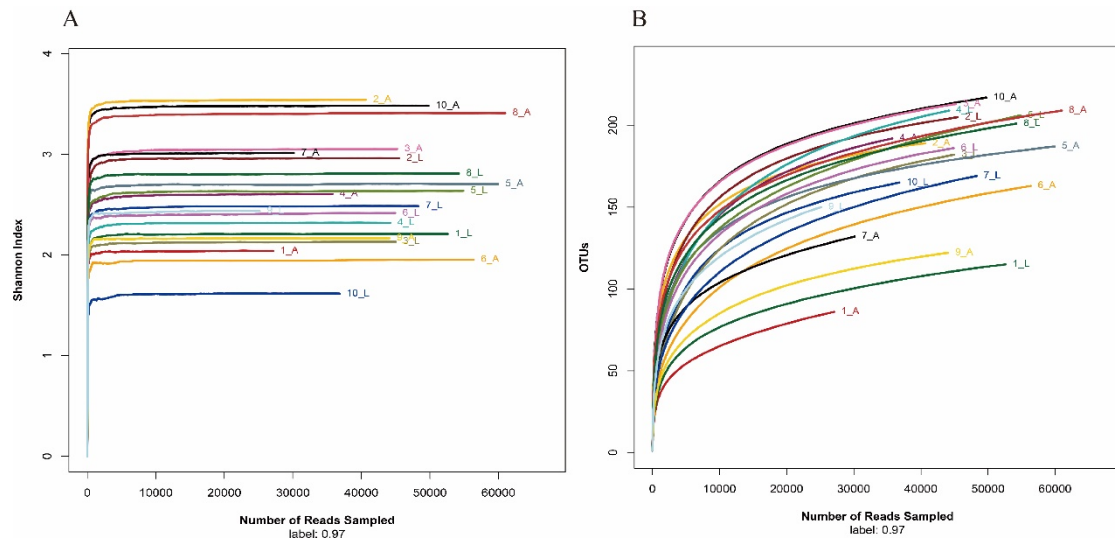

**Figure S2.** Shannon curves and rarefaction curves. (A) Shannon index of sample sequence. (B) The rarefaction curve obtained from the sample sequencing. Note: 1-10 indicates volunteer number, "\_A" for the VIS group, "\_L" for VIL group.

## Tables

**Table S1.** Screening of folate producers from raw cow milk.

| Strain | Growth in Folic Acid Assay Broth | Extracellular folate (ng/mL) | Intracellular folate (ng/mL) | Total folate (ng/mL) |
|--------|----------------------------------|------------------------------|------------------------------|----------------------|
| LZ54   | -                                | ND                           | ND                           | ND                   |
| LZ55   | -                                | ND                           | ND                           | ND                   |
| LZ201  | -                                | ND                           | ND                           | ND                   |
| LZ202  | -                                | ND                           | ND                           | ND                   |
| LZ216  | -                                | ND                           | ND                           | ND                   |
| LZ225  | -                                | ND                           | ND                           | ND                   |
| LZ231  | -                                | ND                           | ND                           | ND                   |
| LZ204  | -                                | ND                           | ND                           | ND                   |
| LZ217  | +                                | 37.88 ± 0.02                 | 201.82 ± 0.06                | 239.70 ± 0.03        |
| LZ220  | +                                | 4.20 ± 0.05                  | 1.30 ± 0.05                  | 5.50 ± 0.02          |
| LZ221  | -                                | ND                           | ND                           | ND                   |
| LZ223  | -                                | ND                           | ND                           | ND                   |
| LZ229  | -                                | ND                           | ND                           | ND                   |
| LZ232  | -                                | ND                           | ND                           | ND                   |
| LZ206  | +                                | 19.44 ± 0.01                 | 42.62 ± 0.05                 | 62.06 ± 0.03         |
| LZ227  | -                                | ND                           | ND                           | ND                   |

|       |   |                  |                   |                   |
|-------|---|------------------|-------------------|-------------------|
| LZ228 | - | ND               | ND                | ND                |
| LZ4   | + | $41.11 \pm 0.03$ | $102.90 \pm 0.07$ | $144.01 \pm 0.01$ |
| LZ8   | + | $83.65 \pm 0.05$ | $92.81 \pm 0.02$  | $176.46 \pm 0.05$ |
| LZ9   | + | $4.59 \pm 0.02$  | $41.40 \pm 0.05$  | $45.99 \pm 0.04$  |
| LZ222 | - | ND               | ND                | ND                |

---

Note: 'ND' means not detected.
